# Supplementary material
Source: Springer Nature journal article supplement (https://www.springermedizin.de/resource/supplementary/12885_2007_1075_MOESM4_ESM.pdf/9471042)

### SIR and local clusters

a. Both sexes

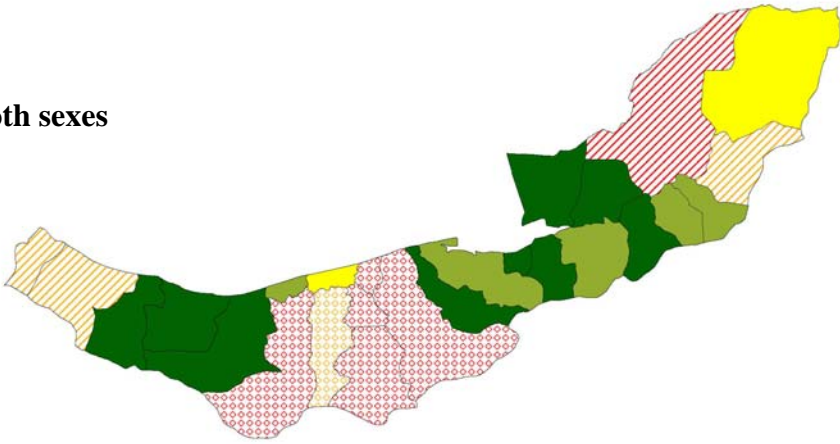

b. Female

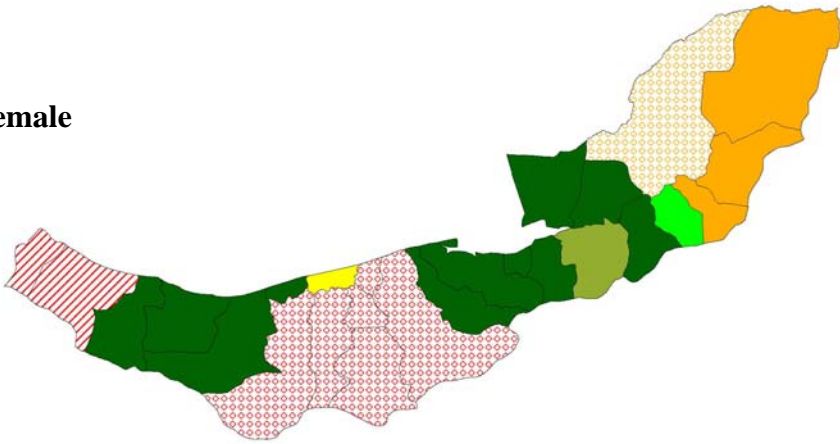

c. Male

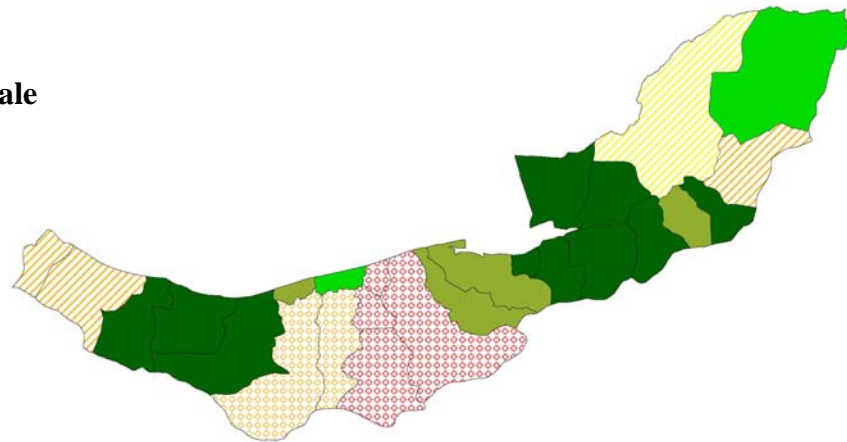

### Smoothed RR

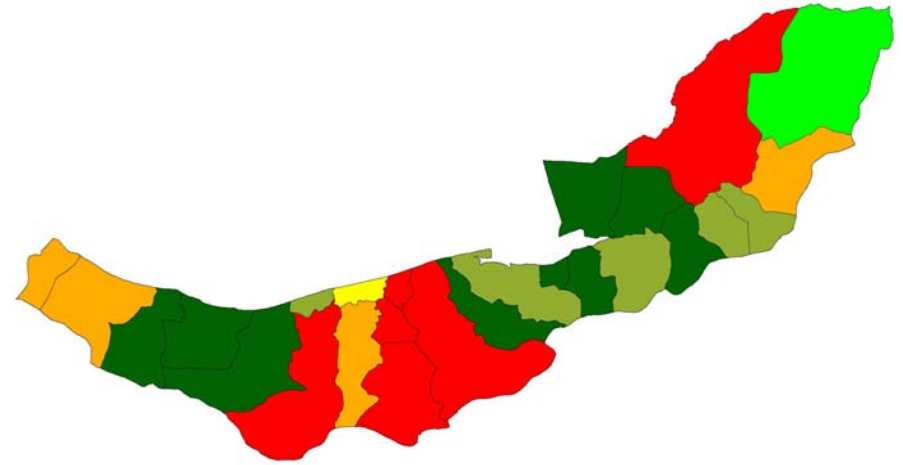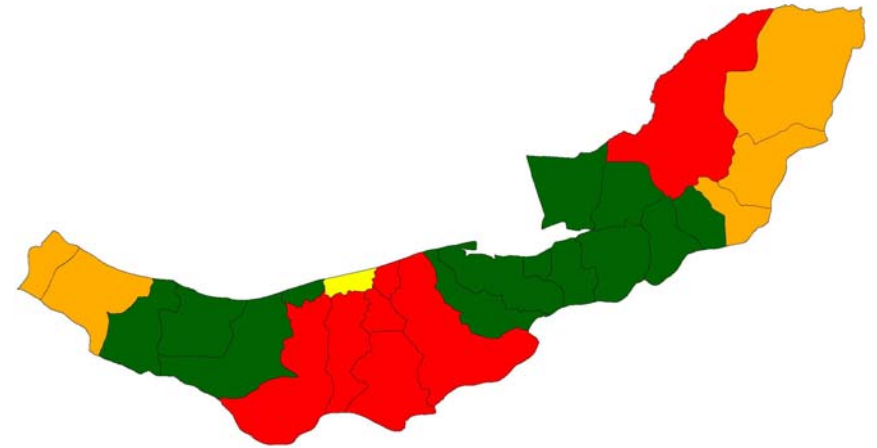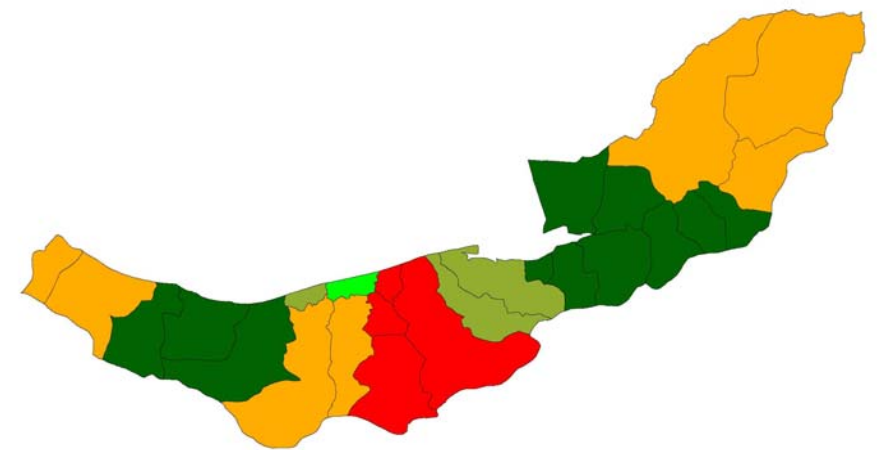

Supplement: MOESM4 [file 9471042]
